# Supplementary material
Source: Springer Nature journal article supplement (https://www.springermedizin.de/resource/supplementary/12916_2011_493_MOESM4_ESM.pdf/9597938)

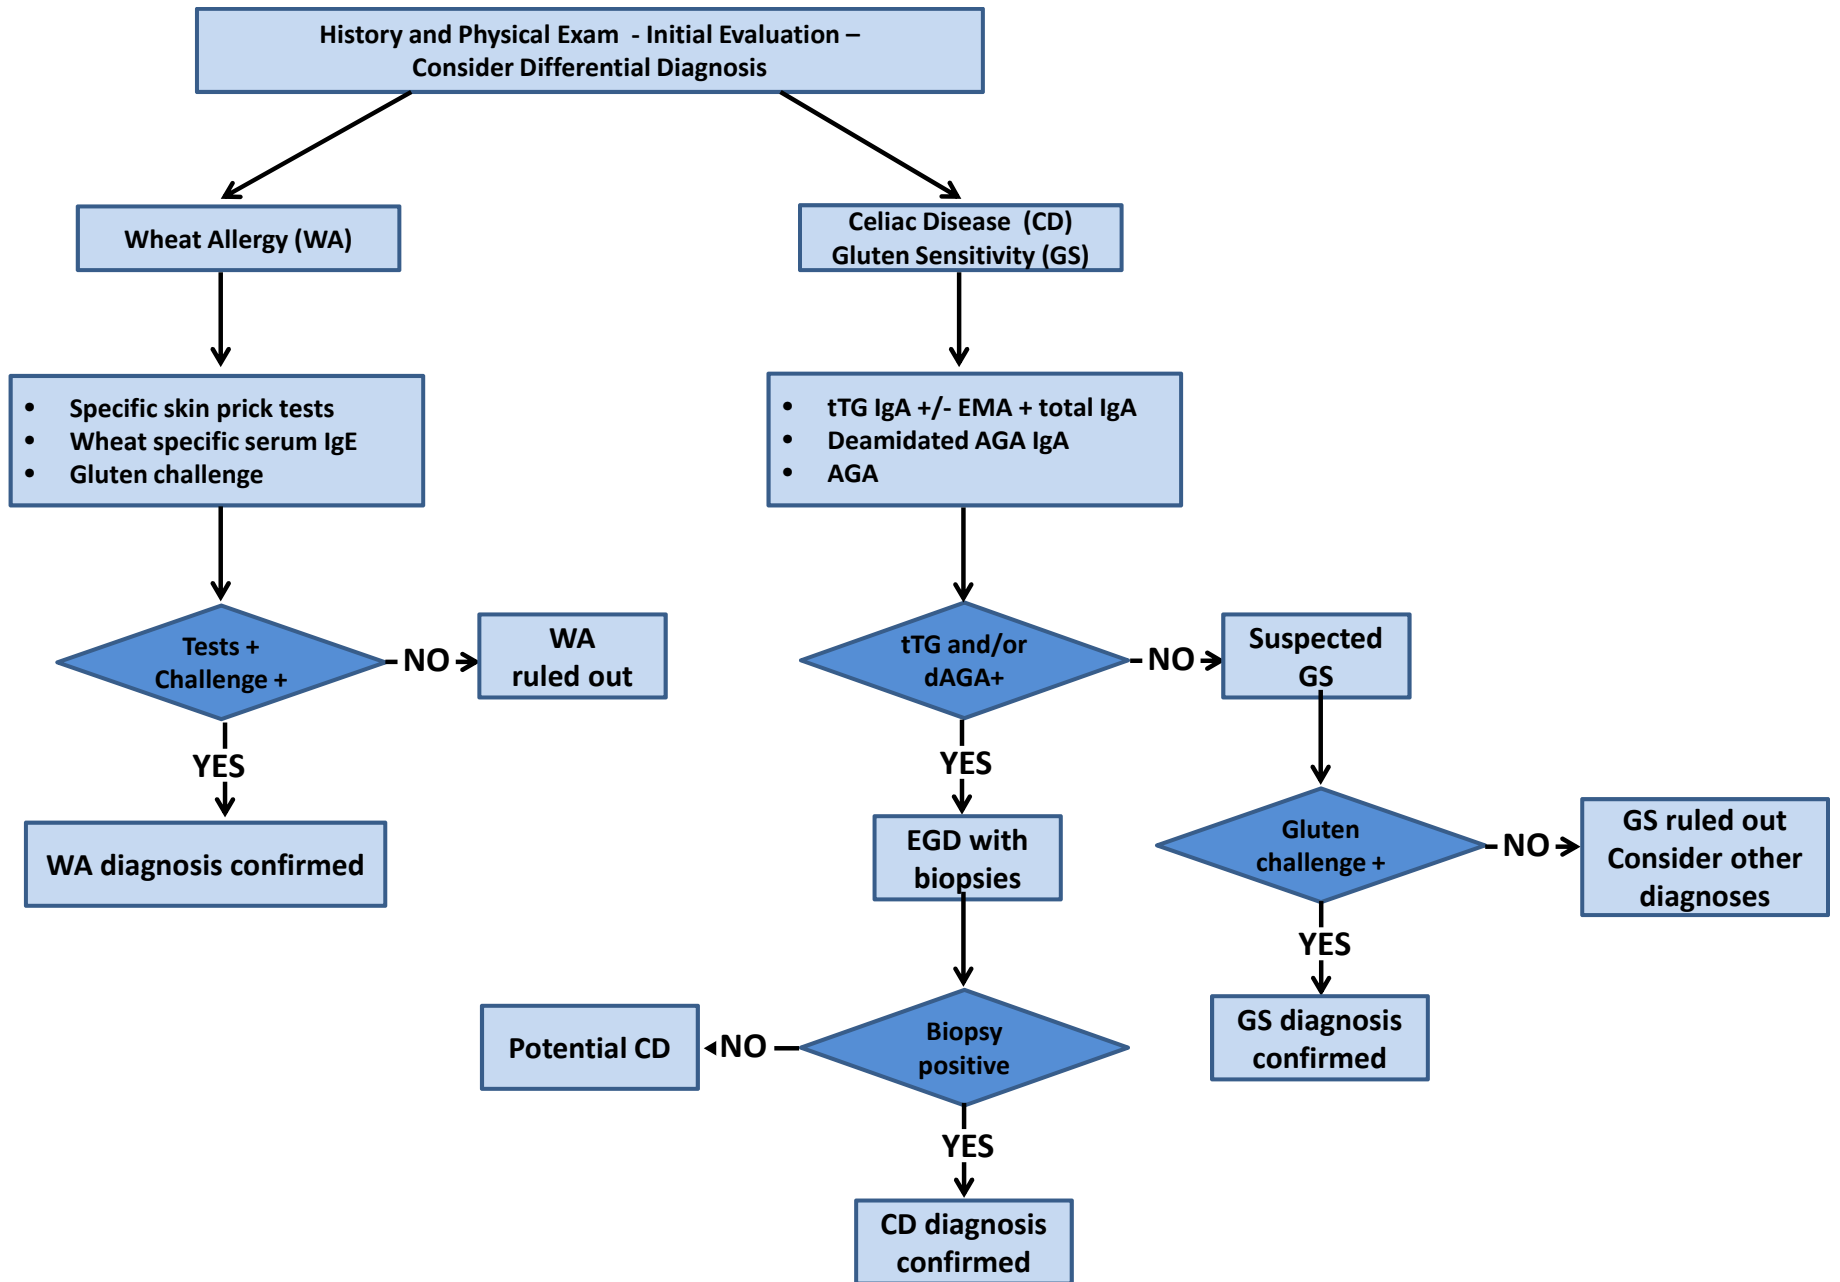

Supplement: MOESM4 [file 9597938]
